# Supplementary material for: What is the Validity of Questionnaires Assessing Fruit and Vegetable Consumption in Children when Compared with Blood Biomarkers? A Meta-Analysis
Source: MDPI journal article supplement (doi:10.3390/nu10101396), 2018-10-01
Supplement: s1 [file s1]

**Supplementary Material 4** Main reasons for exclusion of the full-text articles assessed for eligibility.

| First Author          | Public. Year | Article Title                                                                                                                                                                                                    | Main reason for exclusion    |
|-----------------------|--------------|------------------------------------------------------------------------------------------------------------------------------------------------------------------------------------------------------------------|------------------------------|
| Biltoft-Jensen et al. | 2013         | Evaluation of Web-based Dietary Assessment Software for Children: comparing reported fruit, juice and vegetable intakes with plasma carotenoid concentration and school lunch observations                       | Sample 11 years              |
| Byers, T.             | 1993         | The accuracy of parental reports of their children's intake of fruits and vegetables: validation of a food frequency questionnaire with serum levels of carotenoids and vitamins C, A, and E                     | Included                     |
| Carlsen, M. H.        | 2011         | Relative validity of fruit and vegetable intake estimated from an FFQ, using carotenoid and flavonoid biomarkers and the method of triads                                                                        | Sample 18-80 years           |
| Cullen, K. W.         | 2004         | Validity and reliability of a behavior-based food coding system for measuring fruit, 100% fruit juice, vegetable, and sweetened beverage consumption: results from the Girls Health Enrichment Multisite Studies | Biomarker                    |
| Fiorentino, M.        | 2016         | Nutrient intake is insufficient among senegalese urban school children and adolescents: Results from two 24 h recalls in state primary schools in Dakar                                                          | Sample 5-17 years            |
| Fraser, G. E.         | 2016         | Biomarkers of dietary intake are correlated with corresponding measures from repeated dietary recalls and food-frequency questionnaires in the Adventist Health Study-2                                          | Sample $\geq 18$ years       |
| Golley, R. K.         | 2015         | A dietary guideline adherence score is positively associated with dietary biomarkers but not lipid profile in healthy children                                                                                   | Sample (4-11) years          |
| Greene, G. W.         | 2008         | Correspondence of the NCI fruit and vegetable screener to repeat 24-H recalls and serum carotenoids in behavioral intervention trials                                                                            | Sample $\geq 18$ years       |
| Knutsen, S. F.        | 2001         | Comparing biological measurements of vitamin C, folate, alpha-tocopherol and carotene with 24-hour dietary recall information in nonhispanic blacks and whites                                                   | Sample $\geq 18$ years       |
| Medin, A. C.          | 2016         | Associations between reported intakes of carotenoid-rich foods and concentrations of carotenoids in plasma: a validation study of a web-based food recall for children and adolescents                           | Included                     |
| Nguyen, L.            | 2013         | Evaluating the relationship between fruit and vegetable intake using plasma and dermal biomarkers and reported dietary intake in 4th grade children                                                              | Sample 9-12 years            |
| Royo-Bordonada, M. A. | 2003         | Food sources of nutrients in the diet of Spanish children: the Four Provinces Study                                                                                                                              | Biomarker                    |
| Royo-Bordonada, M. A. | 2003         | Greater dietary variety is associated with better biochemical nutritional status in Spanish children: The Four Provinces Study                                                                                   | Exposure                     |
| Royo-Bordonada, M. A. | 2003         | Spanish children's diet: compliance with nutrient and food intake guidelines                                                                                                                                     | Biomarker                    |
| Ryman, T. K.          | 2015         | Characterising the reproducibility and reliability of dietary patterns among Yup'ik Alaska Native people                                                                                                         | Sample $\geq 18$ years       |
| Signorello, L. B.     | 2010         | Biochemical validation of food frequency questionnaire-estimated carotenoid, $\alpha$ -tocopherol, and folate intakes among African Americans and non-hispanic whites in the southern community cohort study     | Sample $\geq 18$ years       |
| Strauss, R. S.        | 1999         | Comparison of serum concentrations of $\alpha$ -tocopherol and $\beta$ -carotene in a cross-sectional sample of obese and nonobese children (NHANES III)                                                         | Sample (6-11); (12-18) years |
| Townsend, M. S.       | 2016         | Vegetable behavioral tool demonstrates validity with My Plate vegetable cups and carotenoid and inflammatory biomarkers                                                                                          | No validity coefficient      |
| Yin, S.               | 2000         | Effect of green and yellow vegetables on serum carotenoid in children                                                                                                                                            | Language (Chinese)           |
