# Supplementary material for: What is the Validity of Questionnaires Assessing Fruit and Vegetable Consumption in Children when Compared with Blood Biomarkers? A Meta-Analysis
Source: MDPI journal article supplement (doi:10.3390/nu10101396), 2018-10-01
Supplement: s1 [file s1]

**Supplementary Material 2** Extraction form of full-text articles assessed for eligibility.

| Reference            | Byers et al. (1993)                                                                                                                                                                          | Royo-Bordonada et al. (2003)                                                                                                   | Biltoft-Jensen et al. (2013)                                                                                                                                                               | Aguilar et al. (2014)                                                        | Augusto et al. (2014)                                                                                                  | Medin et al. (2016)                                                                                                                                                                    |
|----------------------|----------------------------------------------------------------------------------------------------------------------------------------------------------------------------------------------|--------------------------------------------------------------------------------------------------------------------------------|--------------------------------------------------------------------------------------------------------------------------------------------------------------------------------------------|------------------------------------------------------------------------------|------------------------------------------------------------------------------------------------------------------------|----------------------------------------------------------------------------------------------------------------------------------------------------------------------------------------|
| Survey Year          | 1985-1990                                                                                                                                                                                    | 1998-1999                                                                                                                      | 2011                                                                                                                                                                                       | --                                                                           | 2007                                                                                                                   | 2013                                                                                                                                                                                   |
| Country              | USA                                                                                                                                                                                          | Spain                                                                                                                          | Denmark                                                                                                                                                                                    | USA                                                                          | Brazil                                                                                                                 | Norway                                                                                                                                                                                 |
| Article title        | The accuracy of parental reports of their children's intake of fruits and vegetables: Validation of a food frequency questionnaire with serum levels of carotenoids and vitamins C, A, and E | Greater dietary variety is associated with better biochemical nutritional status in Spanish children: The Four Provinces Study | Evaluation of Web-based Dietary Assessment Software for Children: comparing reported fruit, juice and vegetable intakes with plasma carotenoid concentration and school lunch observations | Skin carotenoids: A biomarker of fruit and vegetable consumption in children | Associations between low consumption of fruits and vegetables and nutritional deficiencies in Brazilian schoolchildren | Associations between reported intakes of carotenoid-rich foods and concentrations of carotenoids in plasma: A validation study of a web-based food recall for children and adolescents |
| Sample age (years)   | 06 to 10                                                                                                                                                                                     | 06 to 07                                                                                                                       | 08 to <b>11 (ADOLESCENT)</b>                                                                                                                                                               | 05 to <b>17 (ADOLESCENT)</b>                                                 | <b>04</b> to 10 ( <b>PRE-SCHOOLAR</b> )                                                                                | 08 to 09                                                                                                                                                                               |
| Sample size (n)      | 97                                                                                                                                                                                           | 1112                                                                                                                           | 81                                                                                                                                                                                         | 25                                                                           | 702                                                                                                                    | 121                                                                                                                                                                                    |
| Girls (%)            | 55.7                                                                                                                                                                                         | 49.9                                                                                                                           | 58.0                                                                                                                                                                                       | 55.0                                                                         | 50.5                                                                                                                   | 55.6                                                                                                                                                                                   |
| Study Type           | Validity                                                                                                                                                                                     | Cross-sectional ( <b>no validity coefficient</b> )                                                                             | Validity                                                                                                                                                                                   | Validity                                                                     | Cross-sectional ( <b>no validity coefficient</b> )                                                                     | Validity                                                                                                                                                                               |
| Supplements assessed | Not declared                                                                                                                                                                                 | No                                                                                                                             | Yes                                                                                                                                                                                        | Yes                                                                          | Not declared                                                                                                           | Yes                                                                                                                                                                                    |
| Nutritional database | Willet                                                                                                                                                                                       | Standard Spanish Food Composition tables                                                                                       | General Intake Estimation System software -Denmark + USDA                                                                                                                                  | Not declared                                                                 | Not declared                                                                                                           | USDA National Nutrient Database                                                                                                                                                        |
| Blood Biomarkers     | b-Carotene, a-Carotene, b-Cryptoxanthin, a-tocopherol, ascorbic acid                                                                                                                         | $\alpha$ -Carotene, $\beta$ -Carotene, Lycopene, Carotenes, Retinol, $\alpha$ -tocopherol, $\gamma$ -tocopherol, vitamin E     | b-Carotene, a-Carotene, b-Cryptoxanthin, Lycopene, Lutein, Zeaxanthin                                                                                                                      | Total carotenoids, Lycopene, a-Carotene, b-Carotene, Lutein, Zeaxanthin      | $\beta$ -Carotene, Lycopene, Tocopherol, Retinol                                                                       | Total plasma carotenoids                                                                                                                                                               |
| Biochemical Method   | HLPC (carotenoids, vitamin A and E) Spectrophotometry (vitamin C)                                                                                                                            | HPLC                                                                                                                           | HPLC                                                                                                                                                                                       | HPLC                                                                         | Not declared                                                                                                           | HPLC                                                                                                                                                                                   |
| Fasting Time Length  | Not required                                                                                                                                                                                 | 12 hour                                                                                                                        | Overnight fasting                                                                                                                                                                          | 10 hour overnight                                                            | Fasting (period not declared)                                                                                          | Non fasting                                                                                                                                                                            |

**Supplementary Material 2 (Continued)**

| Reference                                 | Byers et al. (1993)                                                                                           | Royo-Bordonada et al. (2003)                                          | Biltoft-Jensen et al. (2013)                                                                   | Aguilar et al. (2014)                                | Augusto et al. (2014)                                                                     | Medin et al. (2016)                                                                      |
|-------------------------------------------|---------------------------------------------------------------------------------------------------------------|-----------------------------------------------------------------------|------------------------------------------------------------------------------------------------|------------------------------------------------------|-------------------------------------------------------------------------------------------|------------------------------------------------------------------------------------------|
| <b>Exposure assessment Method</b>         | FFQ (111 food items)                                                                                          | FFQ (77 food items)                                                   | Web-based Dietary Assessment Software                                                          | Web-based 24h dietary recall and FFQ (27 food items) | FFQ                                                                                       | Web-based food recall                                                                    |
| <b>Period</b>                             | Previous 3 months                                                                                             | Previous year                                                         | 7 consecutive nights                                                                           | 24h recall: 3days<br>FFQ: Previous week              | Previous month                                                                            | 4 consecutive nights                                                                     |
| <b>Report</b>                             | Parental                                                                                                      | Mother                                                                | Children self-report                                                                           | Parental                                             | Interview with the mother                                                                 | Parental                                                                                 |
| <b>Consumption</b>                        | Median Fruits and Vegetables (serving/day)<br>Girls: 3.7<br>Boys: 2.9                                         | Median Fruits and Vegetables 669 (g/d)                                | Mean fruits (jam, nuts, fruit syrup), juice and vegetables (g/d)<br>403 weekdays / 321 weekend | Median Fruits and Vegetables 3.0 (serving/day)       | Never: n=100; vegetables $\geq 1$ time/week: n=584; Fruits $\geq 4$ times/week            | Median fruits, juice and vegetables (g/d)<br>225.1                                       |
| <b>Dietary Intake</b>                     | (b-carotene + a-carotene + cryptoxanthin mg/dl) Girls: 46; Boys: 37 (Retinol IU/dl ) Girls: 41; Boys: 42      | <b>Diet Variety Index (together with other foods such as sausage)</b> | b-Carotene + a-Carotene + b-Cryptoxanthin + Lycopene + Lutein þ zeaxanthin: 74 (mg/dl)         | --                                                   | b-Carotene: 400<br>Lycopene:130 (nmol/l)<br><br>Tocopherol:17.3<br>Retinol: 1.13 (µmol/l) | b-Carotene + a-Carotene + b-Cryptoxanthin + Lycopene + Lutein + zeaxanthin: 1.86 (mg/dl) |
| <b>Corr. Vit. A</b>                       | 0.30; Retinol:0.25                                                                                            | 0.13; Retinol: 0.08                                                   | 0.58                                                                                           | 0.08 (24h recall)<br>0.18 (FFQ)                      | <b>Indicators of association (b coefficient)</b>                                          | 0.47                                                                                     |
| <b>Corr. Vit. E</b>                       | 0.24                                                                                                          | 0.10                                                                  | --                                                                                             | --                                                   | <b>129.6 (b coefficient)</b>                                                              | --                                                                                       |
| <b>Corr. Vit. C</b>                       | 0.34                                                                                                          | --                                                                    | --                                                                                             | --                                                   | --                                                                                        | --                                                                                       |
| <b>Criterion Validity Test</b>            | Spearman                                                                                                      | Pearson                                                               | Spearman                                                                                       | Multivariable linear regression                      | Pearson                                                                                   | Spearman                                                                                 |
| <b>Covariates in fully adjusted model</b> | Age, BMI, ethnicity, family history of artery disease, triglycerides, blood cholesterol, total caloric intake | Total caloric intake                                                  | Age, sex, BMI, parental education, total energy expenditure, fat intake and illness            | Age, sex, race, BMI, weight                          | Age and sex                                                                               | Age, sex, BMI, ethnicity, family structure, parental education                           |
| <b>Conflict of Interest</b>               | Not declared                                                                                                  | Not declared                                                          | None                                                                                           | NuSkin LLC                                           | None                                                                                      | None                                                                                     |
