# Supplementary material for: What is the Validity of Questionnaires Assessing Fruit and Vegetable Consumption in Children when Compared with Blood Biomarkers? A Meta-Analysis
Source: Nutrients. 2018 Oct 1;10(10):1396. doi: 10.3390/nu10101396 (PMC6212808; doi:10.3390/nu10101396)
Supplement: Supplementary file 1 [file nutrients-10-01396-s001.zip]

Archive with 4 entries (4 files):
- Additional file 1-PRISMA.pdf
- Additional file 2.pdf
- Additional file 3.pdf
- Additional file 4_Exclusion.pdf
