# Supplementary figures and images for: What is the Validity of Questionnaires Assessing Fruit and Vegetable Consumption in Children when Compared with Blood Biomarkers? A Meta-Analysis
Source: MDPI journal article supplement (doi:10.3390/nu10101396), 2018-10-01

Funnel plot with pseudo 95% confidence limits

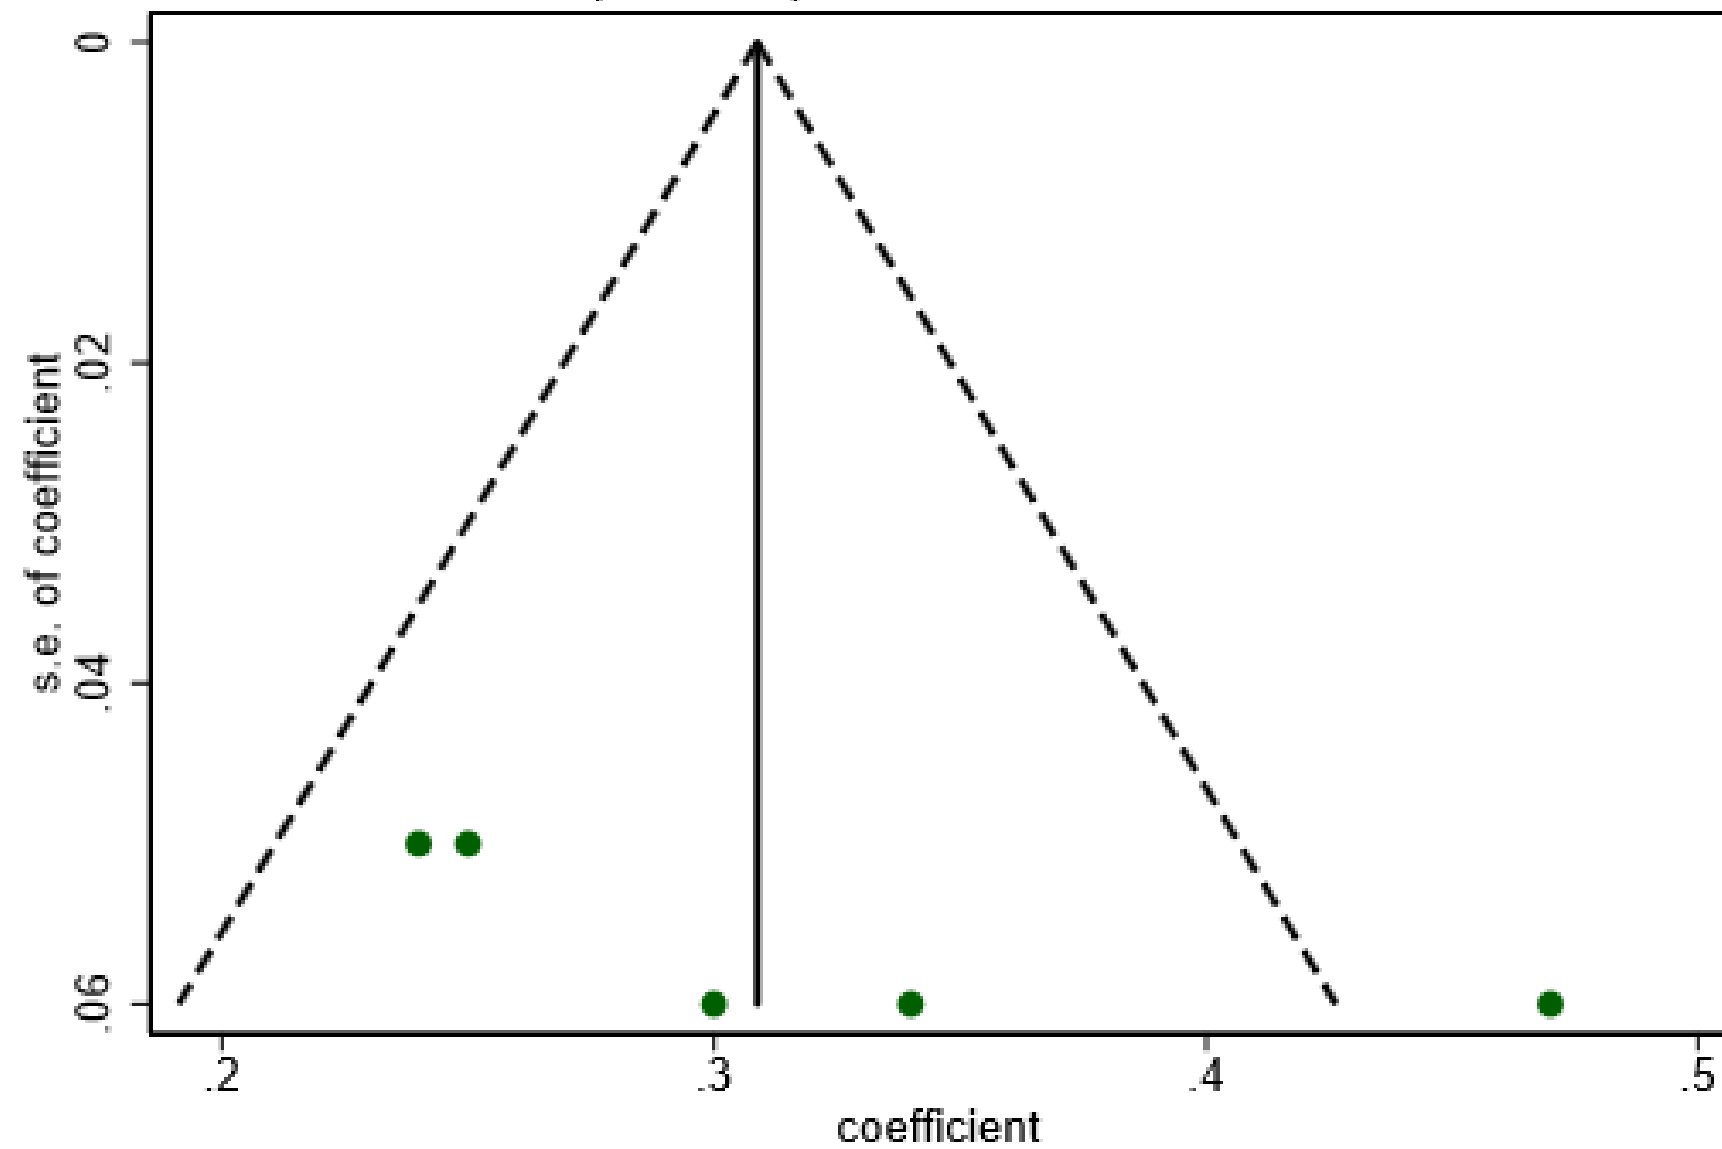

Supplement: s1 [file s1]
